# Supplementary material for: Trophism and Homeostasis of Liver Sinusoidal Endothelial Graft Cells during Preservation, with and without Hypothermic Oxygenated Perfusion
Source: MDPI journal article supplement (doi:10.3390/biology11091329), 2022-09-08
Supplement: s1 [file s1]

|         |         | Flushing |      |      |        | Perfusion |      |      |        |
|---------|---------|----------|------|------|--------|-----------|------|------|--------|
|         |         | Min      | Max  | Mean | St.Dev | Min       | Max  | Mean | St.Dev |
| pH      | Initial | 6.60     | 7.39 | 7.02 | 0,13   | 6.95      | 7.34 | 7.17 | 0.11   |
|         | Final   | 6.90     | 7.39 | 7.04 | 0.10   | 6.87      | 7.25 | 7.11 | 0.08   |
| pCO2    | Initial | 5        | 9    | 5    | 0.98   | 4         | 15   | 6    | 2.46   |
|         | Final   | 5        | 15   | 8    | 2.18   | 5         | 16   | 7    | 2.33   |
| pO2     | Initial | 205      | 279  | 243  | 16.75  | 14        | 1000 | 322  | 205.81 |
|         | Final   | 127      | 695  | 236  | 110.05 | 89        | 900  | 403  | 233.23 |
| Glucose | Initial | 3        | 157  | 13   | 28.23  | 181       | 368  | 204  | 33.78  |
|         | Final   | 64       | 348  | 152  | 53.2   | 185       | 560  | 270  | 79.71  |
| Lactose | Initial | 0.2      | 2.4  | 0.3  | 0.39   | 0.4       | 6.1  | 1,7  | 1.38   |
|         | Final   | 0.3      | 7.4  | 2.4  | 1.21   | 0.6       | 9.2  | 3,5  | 1.76   |

**Table S1.** Perfusion variables.
